# Supplementary material for: Strongly fluorescent organogels and self-assembled nanostructures from pyrene coupled coumarin derivatives: application in cell imaging
Source: Royal Society of Chemistry journal article supplement (doi:10.1039/c5tb00694e), 2015-01-01
Supplement: c5tb00694e2.pdf [file c5tb00694e2.pdf]

# Supporting Information

## **Strongly Fluorescent Organogels and self-assembled Nanostructures from pyrene coupled coumarin derivatives: Application in cell imaging**

**Krishnamoorthy Lalitha, Subbiah Nagarajan\***

*Organic Synthesis Group, Department of Chemistry & The Centre for Nanotechnology and  
Advanced Biomaterials, School of Chemical and Biotechnology, SASTRA University, Thanjavur  
- 613401, Tamil Nadu, INDIA Fax: 04362264120; Tel: 04362304270; E-mail:  
nagarajan@scbt.sastra.edu.*

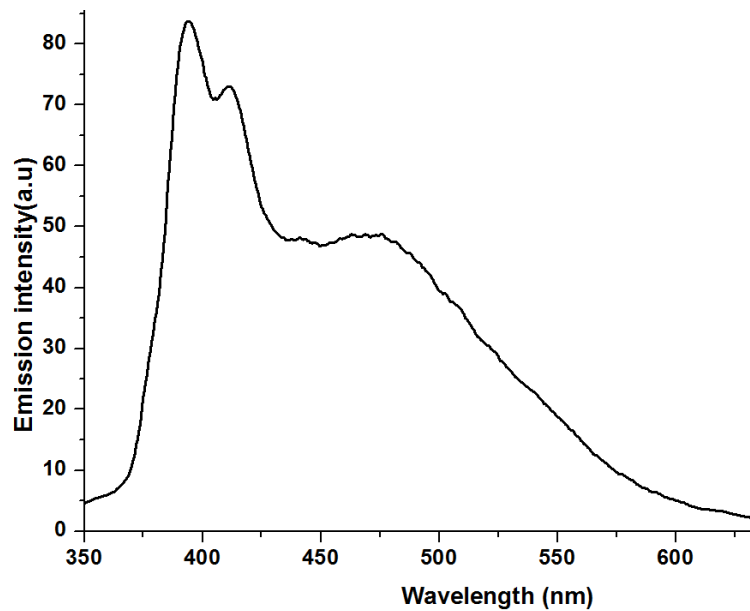

**Figure S1** - Emission spectra of **5a** in DMSO ( $1 \times 10^{-5}$  M)

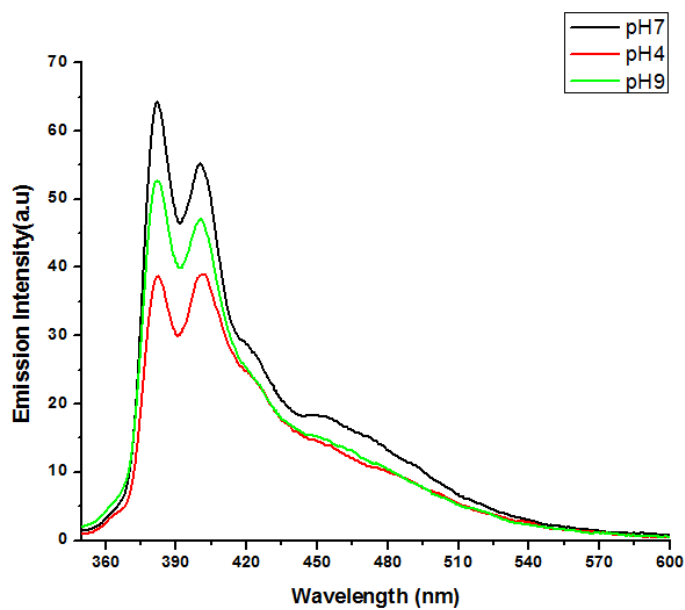

**Figure S2** - Emission spectra of **5a** in DMSO-under the influence of different pH ( $1 \times 10^{-5}$  M)  
[ $\lambda_{\text{ex}} = 325\text{nm}$ ].

# Nanoparticle analysis report

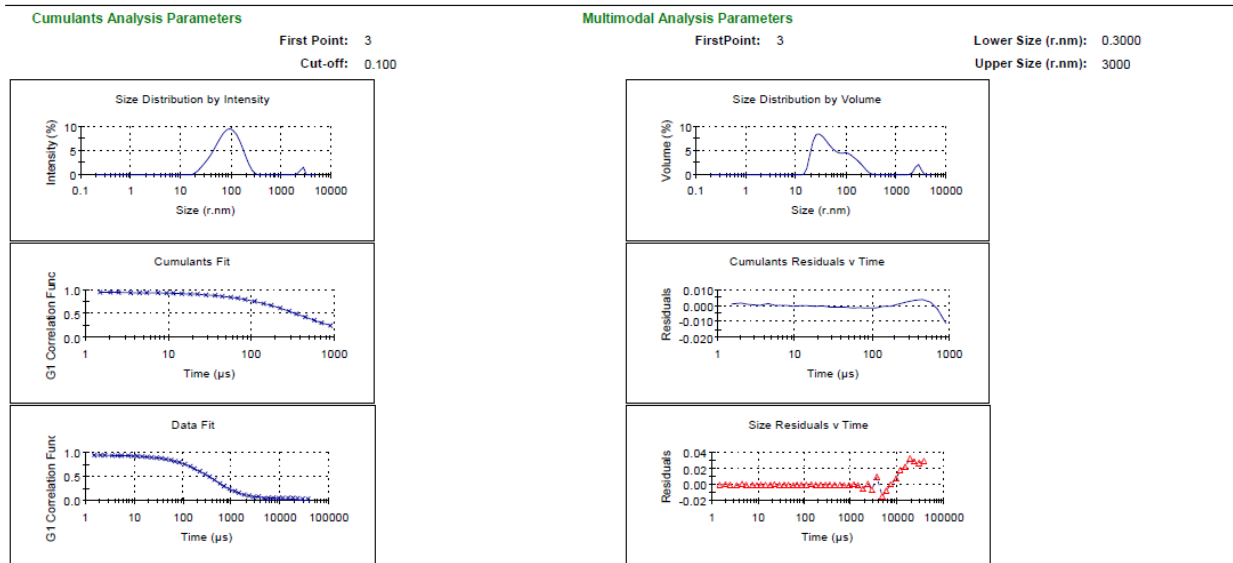

**Figure S3** - Average sizes of self-assembled aggregates of 5a in in DMSO-water mixture ( $1 \times 10^{-3}$  M solution)

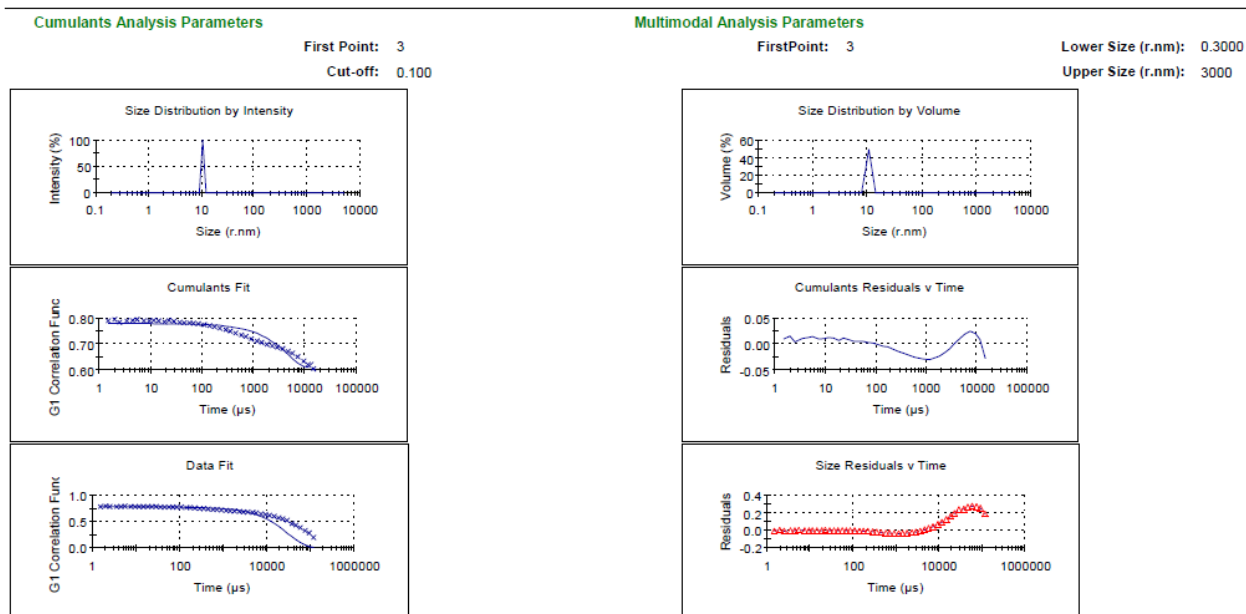

**Figure S4** - Average sizes of self-assembled aggregates of 5b in in DMSO-water mixture ( $1 \times 10^{-3}$  M solution)

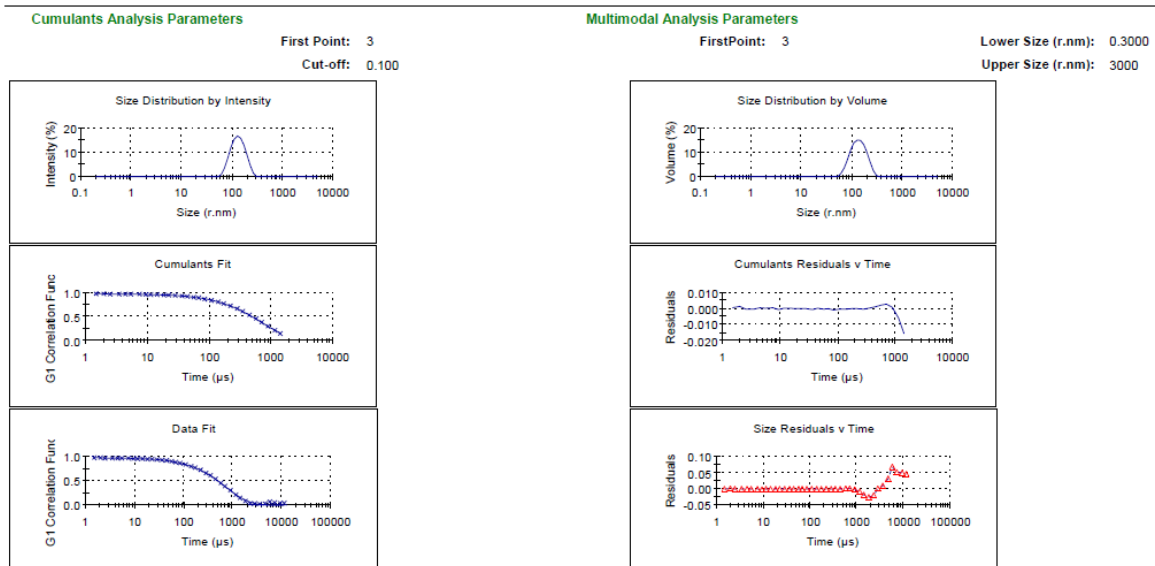

**Figure S5** - Average sizes of self-assembled aggregates of **5c** in in DMSO-water mixture ( $1 \times 10^{-3}$  M solution)
